# Supplementary material for: Role of Peer Learning in Students’ Skill Acquisition and Interest in Plastic Surgery
Source: PubMed Central journal article supplement — Plast Reconstr Surg Glob Open. 2019 Nov 27;7(11):e2560. doi: 10.1097/GOX.0000000000002560 (PMC6908346; doi:10.1097/gox.0000000000002560), 2019-11-27
Supplement: gox-7-e2560-s001.pdf [file gox-7-e2560-s001.pdf]

**\* 1. Study ID**

\*\*\*\*\*

Please enter the STUDY ID that was emailed to you

**\* 2. Age**

**\* 3. Sex**

Male

Female

**\* 4. What year are you in? (Select one option)**

Class of 2022

Class of 2021

Class of 2020

Class of 2019

Other (Please specify) \_\_\_\_\_

**\* 5. Marital status (Select one option)**

Single

Married

Divorced

In a relationship

**\* 6. Highest academic level attained/successfully completed (Select one option)**

Med-P

Undergraduate degree

Postgraduate degree (Masters/PhD/Post doctorate)

**\* 7. Suturing experience: (Select one option)**

Beginner

Intermediate

Advanced

**\* 8. Select ALL the suturing techniques that you are comfortable with (multiple selection allowed)**

- Simple interrupted
- Simple running
- Subcuticular
- Horizontal mattress
- Vertical mattress
- None of the above

**\* 9. For the following 2 questions please rate your answer on a scale from 0-10**

**Confidence in suturing ability** (Select one option)

|                       |                       |                       |                       |                       |                       |                       |                       |                       |                       |                       |
|-----------------------|-----------------------|-----------------------|-----------------------|-----------------------|-----------------------|-----------------------|-----------------------|-----------------------|-----------------------|-----------------------|
| not<br>confident<br>0 | 1                     | 2                     | 3                     | 4                     | 5                     | 6                     | 7                     | 8                     | 9                     | confident<br>10       |
| <input type="radio"/> |

**\* 10. Confidence in being inside an operating room** (Select one option)

|                       |                       |                       |                       |                       |                       |                       |                       |                       |                       |                       |
|-----------------------|-----------------------|-----------------------|-----------------------|-----------------------|-----------------------|-----------------------|-----------------------|-----------------------|-----------------------|-----------------------|
| Not<br>confident<br>0 | 1                     | 2                     | 3                     | 4                     | 5                     | 6                     | 7                     | 8                     | 9                     | confident<br>10       |
| <input type="radio"/> |

**\* 11. I have received adequate surgical skills training so far throughout my training** (Select one option)

- Strongly disagree
- Disagree
- Agree
- Strongly agree

**\* 12. I have previously seen a surgical case in an operation room:** (Select one option)

- No
- Observed but never scrubbed in
- I have scrubbed in

**\* 13. I am interested in applying into a surgical program (Select one option)**

- No
- Yes
- Unsure

**\* 14. Are you considering another specialty other than surgery? (Select one option)**

- No
- Yes
- Unsure

**\* 15. Please rank the top 3 specialties that you perceive to require the most technical skills**

|  |
|--|
|  |
|--|

**\* 16. Please select the top 3 factors you find most appealing in Surgery (only sort your top 3 choices in order of priority, disregard the rest) [ Please rank all option(s). ]**

|                               |                      |
|-------------------------------|----------------------|
| Perceived prestige/reputation | <input type="text"/> |
| Lifestyle                     | <input type="text"/> |
| Perceived satisfaction        | <input type="text"/> |
| Remuneration                  | <input type="text"/> |
| Enjoy the manual aspect       | <input type="text"/> |
| Looking up to a mentor        | <input type="text"/> |
| Intellectually stimulating    | <input type="text"/> |
| Problem solving               | <input type="text"/> |

Family member in these disciplines

Future Job opportunities

**\* 17. Please select the top 3 factors you find least appealing in Surgery (only sort your top 3 choices in order of priority, disregard the rest) [ Please rank all option(s). ]**

Competitive nature

Low perceived technical skill

Previous bad experience

Long post graduate training course

Long working hours

Hierarchy

Lack of critical thinking

Lack of problem solving

Lack of patient contact

Narrow variety of patient populations encountered

Limited job opportunities

**\* 18. Please rank your top 3 residency choices (only sort your top 3 choices in order of priority, disregard the rest): [ Please rank all option(s). ]**

General surgery

Orthopaedic surgery

Plastic surgery

Otolaryngology

Cardiac surgery

Urology

Neurosurgery

OBGYN

Anesthesia

Internal medicine

Psychiatry

Pediatrics

Neurology

Dermatology

Emergency medicine

Medical imaging (radiology, nuclear medicine etc)

Pathology

Family medicine

**\* 19. What is/are the main reason(s) for attending this session (choose as many as apply; multiple selection allowed)**

- Evaluate my interest in surgery
- Improve my suturing skills for clerkship
- Improve my suturing skills for electives
- Meet and network with surgical residents/clerks
- Certificate of completion to help with my residency
- Other (Please specify) \_\_\_\_\_

**\* 20. For the following set of questions, please rate your answers on a scale from 0-10**

**Interest in pursuing a career in surgery** (Select one option)

|                |   |   |   |   |   |   |   |   |   |                 |
|----------------|---|---|---|---|---|---|---|---|---|-----------------|
| Not interested |   |   |   |   |   |   |   |   |   | very interested |
| 0              | 1 | 2 | 3 | 4 | 5 | 6 | 7 | 8 | 9 | 10              |



Appendix B

**1. Study ID**

\*\*\*\*\*

**Please enter the STUDY ID that was emailed to you**

**\* 2. Age:**

**\* 3. Sex: (Select one option)**

- Male
- Female

**\* 4. What year are you in? (Select one option)**

- Class of 2023
- Class of 2022
- Class of 2021
- Class of 2020
- Class of 2019
- Other (Please specify) \_\_\_\_\_

**\* 5. Please select all the suturing techniques that you are comfortable with**

- Simple interrupted
- Simple running
- Subcuticular
- Horizontal mattress
- Vertical mattress
- None of the above

**For the following 2 questions please rate your answer on a scale from 0-10 (0: not confident, 10: very confident)**

**\* 6. Confidence in suturing ability (Select one option)**

|                       |                       |                       |                       |                       |                       |                       |                       |                       |                       |                         |
|-----------------------|-----------------------|-----------------------|-----------------------|-----------------------|-----------------------|-----------------------|-----------------------|-----------------------|-----------------------|-------------------------|
| not<br>confident<br>0 | 1                     | 2                     | 3                     | 4                     | 5                     | 6                     | 7                     | 8                     | 9                     | very<br>confident<br>10 |
| <input type="radio"/>   |

**\* 7. Confidence being inside an operating room (Select one option)**

|                       |                       |                       |                       |                       |                       |                       |                       |                       |                       |                         |
|-----------------------|-----------------------|-----------------------|-----------------------|-----------------------|-----------------------|-----------------------|-----------------------|-----------------------|-----------------------|-------------------------|
| Not<br>confident<br>0 | 1                     | 2                     | 3                     | 4                     | 5                     | 6                     | 7                     | 8                     | 9                     | very<br>confident<br>10 |
| <input type="radio"/>   |

**\* 8. I am interested in applying into a surgical program (Select one option)**

- No
- Yes
- Unsure

**\* 9. Are you considering another specialty other than surgery? (Select one option)**

- No
- Yes
- Unsure

**\* 10. Please select the top 3 factors you find most appealing in Surgery (only top 3, disregard the rest) [ Please rank all option(s). ]**

- Perceived prestige/reputation
- Lifestyle
- Perceived satisfaction
- Remuneration
- Enjoy the manual aspect
- Looking up to a mentor
- Intellectually stimulating

Problem solving

Family member in these disciplines

Future Job opportunities

**\* 11. Please select the top 3 factors you find least appealing Surgery (only top 3, disregard the rest) [ Please rank all option(s). ]**

Competitive nature

Low perceived technical skill

Previous bad experience

Long post graduate training course

Long working hours

Hierarchy

Lack of critical thinking

Lack of problem solving

Lack of patient contact

Narrow variety of patient populations encountered

Limited job opportunities

**\* 12. Please rank your top 3 residency choices (only top 3, disregard the rest): [ Please rank all option(s). ]**

General surgery

Orthopaedic surgery

Plastic surgery

Otolaryngology

Cardiac surgery

Urology

Neurosurgery



|                       |                       |                       |                       |                       |                       |                       |                       |                       |                       |                       |
|-----------------------|-----------------------|-----------------------|-----------------------|-----------------------|-----------------------|-----------------------|-----------------------|-----------------------|-----------------------|-----------------------|
| <input type="radio"/> |
|-----------------------|-----------------------|-----------------------|-----------------------|-----------------------|-----------------------|-----------------------|-----------------------|-----------------------|-----------------------|-----------------------|

**\* 16. Interest in pursuing a career in emergency medicine (Select one option)**

|                       |                       |                       |                       |                       |                       |                       |                       |                       |                       |                       |
|-----------------------|-----------------------|-----------------------|-----------------------|-----------------------|-----------------------|-----------------------|-----------------------|-----------------------|-----------------------|-----------------------|
| not interested<br>0   | 1                     | 2                     | 3                     | 4                     | 5                     | 6                     | 7                     | 8                     | 9                     | very interested<br>10 |
| <input type="radio"/> |

**\* 17. Interest in pursuing a career in medical imaging (Select one option)**

|                       |                       |                       |                       |                       |                       |                       |                       |                       |                       |                       |
|-----------------------|-----------------------|-----------------------|-----------------------|-----------------------|-----------------------|-----------------------|-----------------------|-----------------------|-----------------------|-----------------------|
| Not interested<br>0   | 1                     | 2                     | 3                     | 4                     | 5                     | 6                     | 7                     | 8                     | 9                     | very interested<br>10 |
| <input type="radio"/> |

**\* 18. Interest in pursuing another career (Select one option)**

|                       |                       |                       |                       |                       |                       |                       |                       |                       |                       |                       |
|-----------------------|-----------------------|-----------------------|-----------------------|-----------------------|-----------------------|-----------------------|-----------------------|-----------------------|-----------------------|-----------------------|
| not interested<br>0   | 1                     | 2                     | 3                     | 4                     | 5                     | 6                     | 7                     | 8                     | 9                     | very interested<br>10 |
| <input type="radio"/> |

**\* 19. Interest in doing an elective in a surgical specialty (Select one option)**

|                       |                       |                       |                       |                       |                       |                       |                       |                       |                       |                       |
|-----------------------|-----------------------|-----------------------|-----------------------|-----------------------|-----------------------|-----------------------|-----------------------|-----------------------|-----------------------|-----------------------|
| Not interested<br>0   | 1                     | 2                     | 3                     | 4                     | 5                     | 6                     | 7                     | 8                     | 9                     | Very interested<br>10 |
| <input type="radio"/> |

**\* 20. This session influenced my career planning (Select one option)**

- In favour of surgery
- Did not influence my career choice
- Against surgery

**\* 21. Practicing suturing makes me more interested in pursuing a surgical specialty (Select one option)**

- Strongly disagree
- Disagree
- Agree
- Strongly agree

**\* 22. By participating in this simulator session, I feel more prepared for third-year surgery clerkship (Select one option)**

- Strongly disagree
- Disagree
- Agree
- Strongly agree

**\* 23. This workshop has been useful for developing my technique and confidence in suturing (Select one option)**

- Strongly disagree
- Disagree
- Agree
- Strongly agree

**\* 24. I would be interested to continue participating in these sessions (Select one option)**

- Strongly disagree
- Disagree
- Agree
- Strongly agree

**\* 25. The quality of the tutor was: (Select one option)**

- Extremely bad
- Bad
- Good
- Extremely good

**\* 26. Teaching method was: (Select one option)**

- Extremely bad
- Bad
- Good
- Extremely good

**\* 27. Session length was: (Select one option)**

- Too Short
- Adequate
- Perfect
- Too long

**\* 28. Teaching environment was: (Select one option)**

- Extremely stressful
- Stressful
- Relaxed
- Extremely relaxed

**\* 29. Group size was: (Select one option)**

- Too small
- Adequate
- Perfect
- Too large

**\* 30. Overall how useful did you find the Suturtise sessions (Select one option)**

- Completely not useful
- Useful but needs improvement
- Useful
- Very useful

**31. Please write any suggestions on how to improve the sessions?**

---

---
